# Supplementary material for: Efficient reduced graphene oxide grafted porous Fe3O4 composite as a high performance anode material for Li-ion batteries
Source: Royal Society of Chemistry journal article supplement (doi:10.1039/c3cp54778g), 2013-12-19
Supplement: c3cp54778g.pdf [file c3cp54778g.pdf]

## Supporting Information

### Efficient reduced graphene oxide grafted porous $\text{Fe}_3\text{O}_4$ composites as a high-performance anode material for Li-ion batteries

Subramani Bhuvaneshwari,<sup>a</sup> Parakandy Muzhikara Pratheeksha,<sup>a</sup> Srinivasan Anandan,<sup>a\*</sup>

Dinesh Rangappa,<sup>a</sup> Raghavan Gopalan,<sup>b</sup> Tata Narasinga Rao<sup>a</sup>

<sup>a</sup>Centre for Nano Materials, International Advanced Research Centre for Powder Metallurgy and New Materials, Hyderabad-500 005, India

<sup>b</sup>Centre for Automotive Energy Materials, International Advanced Research Centre for Powder Metallurgy and New Materials, Chennai-600 113, India

#### 1. FE-SEM images of RGO grafted $\text{Fe}_3\text{O}_4$ .

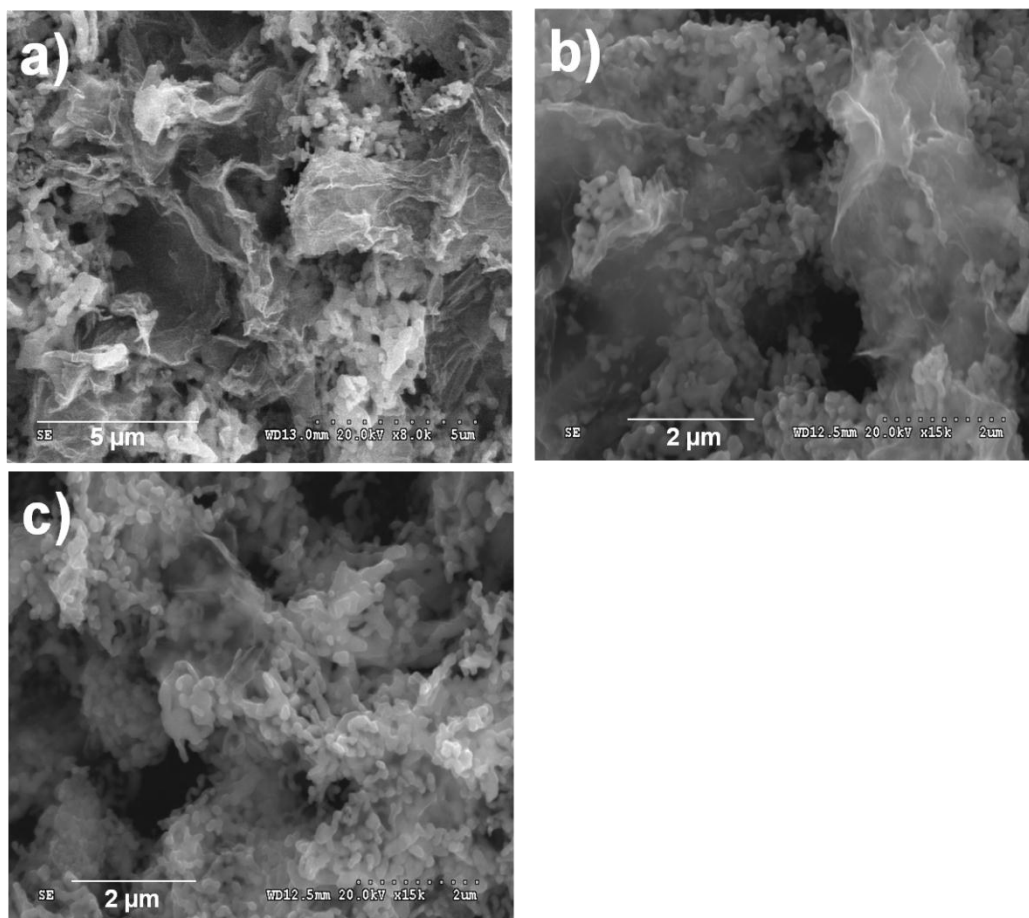

**Figure S1.** FE-SEM images (a,b) of reduced graphene oxide (RGO) grafted  $\text{Fe}_3\text{O}_4$ .

## 2. X-ray photoelectron spectroscopic analysis of Fe<sub>3</sub>O<sub>4</sub>

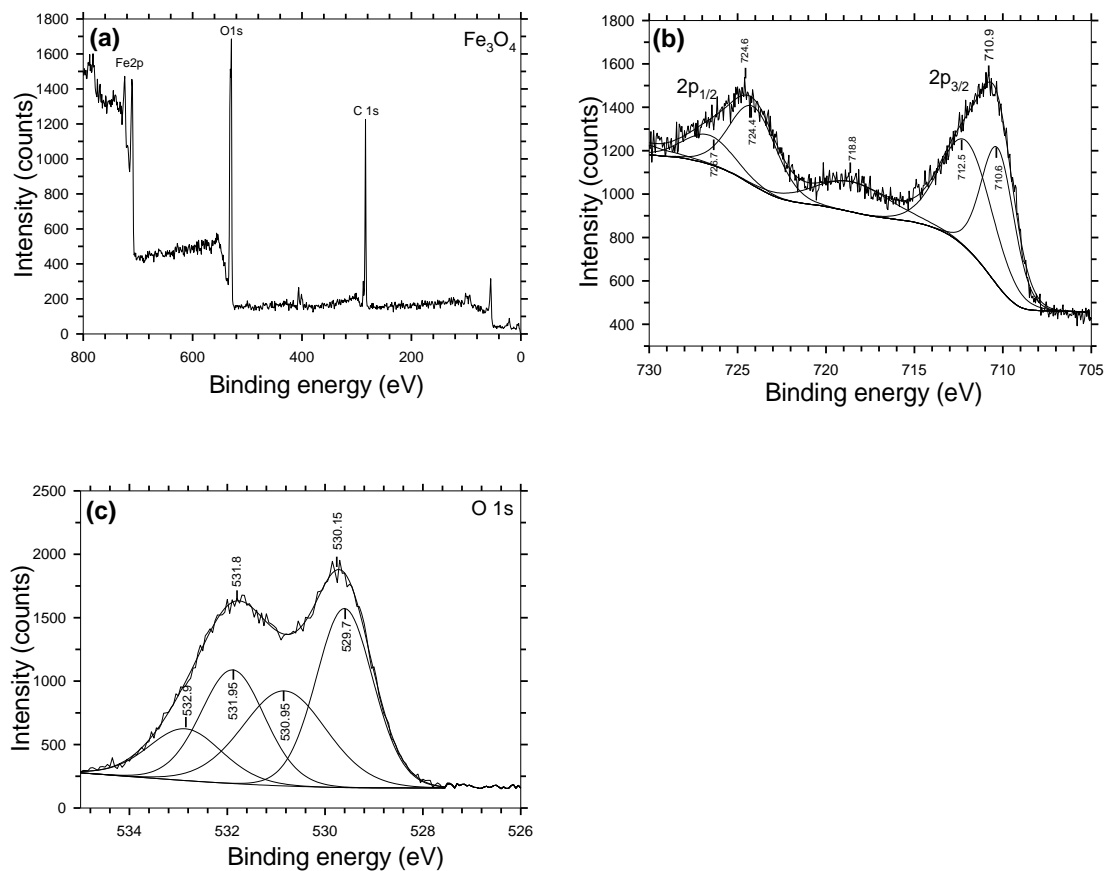

**Figure S2.** XPS spectrum of Fe<sub>3</sub>O<sub>4</sub>. Survey spectrum (a), wide scan spectrum of Fe 2p (b), and O 1s (c).
